# Supplementary material for: Paraneoplastic Syndrome in Splenic Marginal Zone Lymphoma: A Rare Phenomenon of Paraplegia as an Atypical Presenting Manifestation
Source: Hindawi journal article supplement (doi:10.1155/2016/7034167), 2016-01-01
Supplement: f1 [file 7034167.f1.pdf]

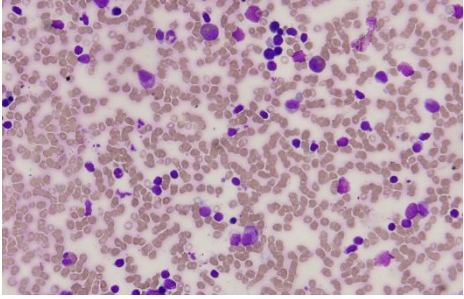

Image 1.

Image 1: Bone marrow aspirate showing lymphocytes with abundant cytoplasm.

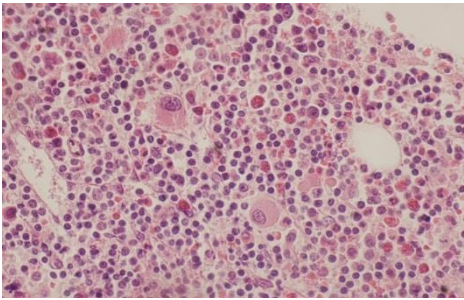

Image 2.

Image 2: Bone marrow biopsy showing a hypercellular marrow primarily occupied by the extensive lymphoid infiltrate composed mostly of small mature lymphocytes.
